# Supplementary material for: Nickel-catalyzed coupling of allyl chlorides and enynes
Source: Royal Society of Chemistry journal article supplement (doi:10.1039/b515508h), 2005-12-13
Supplement: b515508h.pdf [file b515508h.pdf]

## Supplementary Information

### Nickel-catalyzed coupling of allyl chlorides and enynes

Shin-ichi Ikeda,\* Kaori Suzuki and Kazunori Odashima

Graduate School of Pharmaceutical Sciences, Nagoya City University, Tanabe-dori,  
Mizuho-ku, Nagoya 467-8603, Japan

**General Comments.** All reactions were carried out under dry N<sub>2</sub> atmosphere. <sup>1</sup>H and <sup>13</sup>C NMR spectra were recorded in CDCl<sub>3</sub> with Me<sub>4</sub>Si as an internal standard. MeCN was distilled from P<sub>2</sub>O<sub>5</sub>. Enynes **2a**, **2c**, **2e**, and **2f** have been already reported (see, S. Ikeda, R. Sanuki, H. Miyachi, H. Miyashita, M. Taniguchi, K. Odashima, *J. Am. Chem. Soc.*, 2004, **126**, 10331). **2b** and **2d** were prepared by allylation followed by propargylation of diethyl or dimethyl malonate or malononitrile. Other materials were obtained from commercial suppliers and used without further purification.

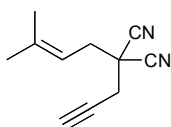

**2-(3-methylbut-2-enyl)-2-(prop-2-ynyl)malononitrile (2b):** a colorless oil; *R<sub>f</sub>* = 0.51 (hexane/AcOEt = 4:1); <sup>1</sup>H NMR (500MHz, CDCl<sub>3</sub>) δ 1.75 (s, 3 H, CH<sub>3</sub>), 1.83 (s, 3 H, CH<sub>3</sub>), 2.38 (t, *J* = 2.7 Hz, 1 H, CH), 2.81 (t, *J* = 7.6 Hz, 2 H, CH<sub>2</sub>), 2.89 (d, *J* = 2.7 Hz, 2 H, CH<sub>2</sub>), 5.26 (t, *J* = 7.6 Hz, 1 H, =CH); <sup>13</sup>C NMR (125 MHz, CDCl<sub>3</sub>) δ 18.43, 26.04, 27.45, 35.07, 36.87 (CH<sub>3</sub>, CH<sub>2</sub>, and C), 74.81, 75.14 (≡CH and ≡C), 113.89, 114.63 (=CH and =C), 141.76 (CN); IR (neat) 3300, 2930, 1430, 660 cm<sup>-1</sup>; GCMS (EI, 70 eV) *m/z* (rel int, %) 172 (M<sup>+</sup>, 7), 157 (58), 94 (90), 79 (100). HRMS for C<sub>11</sub>H<sub>12</sub>N<sub>2</sub> (M<sup>+</sup>): calcd 172.1001, found 172.1023.

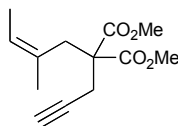

**Dimethyl 2-((Z)-2-methylbut-2-enyl)-2-(prop-2-ynyl)malonate (2d):** a colorless oil; *R<sub>f</sub>* = 0.45 (hexane/AcOEt = 7:1); <sup>1</sup>H NMR (500MHz, CDCl<sub>3</sub>) δ 1.58-1.59 (m, 3 H, CH<sub>3</sub>), 1.63 (d, *J* = 7.0 Hz, 3 H, CH<sub>3</sub>), 2.02 (t, *J* = 2.7, 1 H, CH), 2.79 (d, *J* = 2.7 Hz, 2 H, CH<sub>2</sub>), 2.91 (s, 2 H, CH<sub>2</sub>), 3.74 (s, 6 H, OCH<sub>3</sub>), 5.45 (q, *J* = 7.0 Hz, 1 H, =CH); <sup>13</sup>C NMR (125 MHz, CDCl<sub>3</sub>) δ 13.98, 22.83 (CH<sub>3</sub>), 24.09, 33.74 (CH<sub>2</sub>), 52.73 (C), 56.78 (OCH<sub>3</sub>), 71.42 (≡CH), 79.75 (≡C), 126.07, 129.76 (=CH and =C), 170.90 (C=O); IR (neat) 3300, 2950,

1740 ( $\nu_{\text{CO}}$ ), 1440, 1290, 1200  $\text{cm}^{-1}$ ; GCMS (EI, 70 eV)  $m/z$  (rel int, %) 238 ( $\text{M}^+$ , 8), 163 (92), 147 (100). HRMS for  $\text{C}_{13}\text{H}_{18}\text{O}_4$  ( $\text{M}^+$ ): calcd 238.1190, found 238.1205.

**General experimental procedure:** In a 20-mL three-necked flask were placed  $\text{Ni}(\text{cod})_2$  (0.05 mmol),  $\text{PPh}_3$  (0.1 mmol), Zn dust (1.0 mmol), and MeCN (3 mL), and the mixture was stirred at room temperature for 10 min. To this suspension was added enyne **2** (0.5 mmol) and allyl chloride **1** ( $\text{X} = \text{Cl}$ , 5 mmol) at room temperature, and the mixture was then stirred at the same temperature for 4 h. After the addition of aqueous HCl (5 %, 30 mL), the aqueous layer was extracted with  $\text{Et}_2\text{O}$  (10 mL x 3). The combined organic layer was washed with brine, dried over  $\text{MgSO}_4$  for 30 min, filtered, and concentrated under reduced pressure. The residue was purified by column chromatography on silica gel (hexane–AcOEt, 4:1) to yield **3** as a colorless oil. An analytical sample was obtained by bulb-to-bulb distillation.

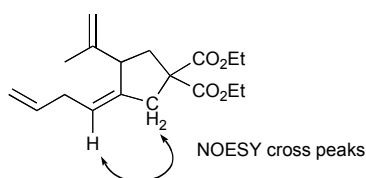

**(Z)-Diethyl 3-(but-3-enylidene)-4-(prop-1-en-2-yl)cyclopentane-1,1-dicarboxylate (3aa):** a colorless oil; bp 135 °C (5 mmHg);  $R_f = 0.57$  (hexane/AcOEt = 4:1);  $^1\text{H}$  NMR (500MHz,  $\text{CDCl}_3$ )  $\delta$  1.30 (t,  $J = 7.0$  Hz, 6 H,  $\text{CH}_3$ ), 1.75 (s, 3 H,  $\text{CH}_3$ ), 2.03 (dd,  $J = 13.4$ , 8.4 Hz, 1 H, one of  $\text{CH}_2$ ), 2.68-2.80 (m, 3 H,  $\text{CH}_2$  and one of  $\text{CH}_2$ ), 2.91 (d,  $J = 15.4$  Hz, 1 H, one of  $\text{CH}_2$ ), 3.04 (dt,  $J = 15.4$ , 2.5 Hz, 1 H, one of  $\text{CH}_2$ ), 3.44 (t,  $J = 7.5$  Hz, 1 H, CH), 4.18-4.27 (m, 4 H,  $\text{OCH}_2$ ), 4.79 (t,  $J = 1.5$  Hz, 1 H, one of  $=\text{CH}_2$ ), 4.86 (t,  $J = 1.5$  Hz, 1 H, one of  $=\text{CH}_2$ ), 4.98 (dq,  $J = 10.1$ , 1.9 Hz, 1 H,  $=\text{CH}$ ), 5.02 (dq,  $J = 17.2$ , 1.9 Hz, 1 H,  $=\text{CH}$ ), 5.49 (t,  $J = 7.5$  Hz, 1 H,  $=\text{CH}$ ), 5.80 (ddt,  $J = 17.2$ , 10.1, 6.4 Hz, 1 H,  $=\text{CH}$ ); The NOESY cross peaks were observed at  $\delta$  5.48 vs.  $\delta$  2.91 and 3.04;  $^{13}\text{C}$  NMR (125 MHz,  $\text{CDCl}_3$ )  $\delta$  14.03, 14.06, 19.34 ( $\text{CH}_3$ ), 32.61, 39.80, 42.78 ( $\text{CH}_2$ ), 47.21 (CH), 59.21 (C), 61.40, 61.43 ( $\text{OCH}_2$ ), 111.19, 114.54 ( $=\text{CH}_2$ ), 122.59 ( $=\text{CH}$ ), 136.65 ( $=\text{CH}$ ), 140.31, 145.96 (C), 171.40, 171.44 ( $\text{O}=\text{C}$ ); IR (neat) 2990, 1730 ( $\nu_{\text{CO}}$ ), 1640, 1445, 1365, 1240, 1195, 1160, 1070, 905  $\text{cm}^{-1}$ ; GCMS (EI, 70 eV)  $m/z$  (rel int, %) 306 ( $\text{M}^+$ , 3), 232 (87), 159 (100). Anal. Calcd for  $\text{C}_{18}\text{H}_{26}\text{O}_4$ : C, 70.56; H, 8.55. Found C, 70.37; H, 8.61.

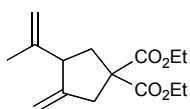

**Diethyl 3-methylene-4-(prop-1-en-2-yl)cyclopentane-1,1-dicarboxylate (4a):** a colorless oil; bp 120 °C (5 mmHg);  $R_f = 0.50$  (hexane/AcOEt = 5:1);  $^1\text{H NMR}$  (500 MHz,  $\text{CDCl}_3$ )  $\delta$  1.24-1.27 (m, 6 H,  $\text{CH}_3$ ), 1.66 (s, 3 H,  $\text{CH}_3$ ), 2.12 (dd,  $J = 13.0, 11.3$  Hz, 1 H, one of  $\text{CH}_2$ ), 2.51 (ddd,  $J = 13.0, 7.8, 1.5$  Hz, 1 H, one of  $\text{CH}_2$ ), 2.91 (dq,  $J = 16.8, 2.4$  Hz, 1 H, one of  $\text{CH}_2$ ), 3.06 (dd,  $J = 16.8, 1.5$  Hz, 1 H, one of  $\text{CH}_2$ ), 3.27-3.32 (m, 1 H, CH), 4.17-4.23 (m, 4 H,  $\text{OCH}_2$ ), 4.81 (d,  $J = 2.4$  Hz, 1 H, one of  $=\text{CH}_2$ ), 4.84 (d,  $J = 1.0$  Hz, 2 H,  $=\text{CH}_2$ ), 5.01-5.02 (br s, 1 H, one of  $=\text{CH}_2$ );  $^{13}\text{C NMR}$  (125 MHz,  $\text{CDCl}_3$ )  $\delta$  14.03, 18.15 ( $\text{CH}_3$ ), 38.48, 40.77 ( $\text{CH}_2$ ), 51.09 (CH), 58.75 (C), 61.52 ( $\text{OCH}_2$ ), 107.92, 113.36 ( $=\text{CH}_2$ ), 144.80, 149.47 ( $=\text{CH}$ ), 171.56, 171.65 ( $\text{O}=\text{C}$ ); IR (neat) 2990, 1730 ( $\nu_{\text{CO}}$ ), 1270, 1250, 1235, 1190, 1075, 890  $\text{cm}^{-1}$ ; GCMS (EI, 70 eV)  $m/z$  (rel int, %) 266 ( $\text{M}^+$ , 8), 192 (70), 119 (100). Anal. Calcd for  $\text{C}_{15}\text{H}_{22}\text{O}_4$ : C, 67.64; H, 8.33. Found C, 67.83; H, 8.54.

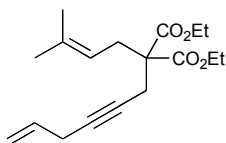

**Diethyl 2-(hex-5-en-2-ynyl)-2-(3-methylbut-2-enyl)malonate (5aa):** a colorless oil; bp 120 °C (2 mmHg);  $R_f = 0.56$  (hexane/AcOEt = 4:1);  $^1\text{H NMR}$  (500MHz,  $\text{CDCl}_3$ )  $\delta$  1.24 (t,  $J = 7.1$  Hz, 6 H,  $\text{CH}_3$ ), 1.65 (s, 3 H,  $\text{CH}_3$ ), 1.69 (s, 3 H,  $\text{CH}_3$ ), 2.75-2.93 (m, 6 H,  $\text{CH}_2$ ), 4.15-4.24 (m, 4 H,  $\text{OCH}_2$ ), 4.93 (t,  $J = 8.0$  Hz, 1 H,  $=\text{CH}$ ), 5.07 (d,  $J = 10.0$  Hz 1 H, one of  $=\text{CH}_2$ ), 5.26 (d,  $J = 17.0$  Hz 1 H, one  $=\text{CH}_2$ ), 5.75-5.81 (m, 1 H,  $=\text{CH}$ );  $^{13}\text{C NMR}$  (125 MHz,  $\text{CDCl}_3$ )  $\delta$  14.06, 17.98 ( $\text{CH}_3$ ), 22.80, 23.00 ( $\text{CH}_2$ ), 26.06 ( $\text{CH}_3$ ), 30.64 ( $\text{CH}_2$ ), 57.28 (C), 61.38 ( $\text{OCH}_2$ ), 79.54, 117.39 ( $\equiv\text{C}$ ), 128.45, 128.55, 132.75, 136.33 ( $=\text{CH}_2$ ,  $=\text{CH}$ , and  $=\text{C}$ ), 170.35 ( $\text{C}=\text{O}$ ); IR (neat) 2980, 1730 ( $\nu_{\text{CO}}$ ), 1420, 1290, 1200, 1060  $\text{cm}^{-1}$ ; DIMS (EI, 70eV)  $m/z$  (rel int, %) 306 ( $\text{M}^+$ , 1), 262 (37), 232 (100). Anal. Calcd for  $\text{C}_{18}\text{H}_{26}\text{O}_4$ : C, 70.56; H, 8.55. Found: C, 70.90; H, 8.38.

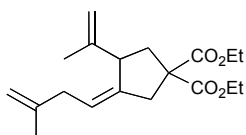

**(Z)-Diethyl**

**3-(3-methylbut-3-enylidene)-4-(prop-1-en-2-yl)cyclopentane-1,1-dicarboxylate**

**(3ba)**: a colorless oil; bp 120 °C (2 mmHg);  $R_f$  = 0.34 (hexane/AcOEt = 9:1);  $^1\text{H}$  NMR (500MHz,  $\text{CDCl}_3$ )  $\delta$  1.23 (t,  $J$  = 7.0 Hz, 3 H,  $\text{CH}_3$ ), 1.24 (t,  $J$  = 7.0 Hz, 3 H,  $\text{CH}_3$ ), 1.66 (s, 3 H,  $\text{CH}_3$ ), 1.69 (s, 3 H,  $\text{CH}_3$ ), 1.97 (dd,  $J$  = 13.1, 8.5 Hz, 1 H, one of  $\text{CH}_2$ ), 2.55-2.74 (m, 3 H,  $\text{CH}_2$  and one of  $\text{CH}_2$ ), 2.85 (d,  $J$  = 15.2 Hz, 1 H, one of  $\text{CH}_2$ ), 3.00 (dt,  $J$  = 15.2, 2.2 Hz, 1 H, one of  $\text{CH}_2$ ), 3.38 (t,  $J$  = 8.9 Hz, 1 H, CH), 4.18 (q,  $J$  = 7.0 Hz, 4 H,  $\text{OCH}_2$ ), 4.62-4.64 (m, 1 H, one of  $=\text{CH}_2$ ), 4.65-4.75 (m, 1 H, one of  $=\text{CH}_2$ ), 4.70-4.73 (m, 1 H, one of  $=\text{CH}_2$ ), 4.77-4.81 (m, 1 H, one of  $=\text{CH}_2$ ), 5.47 (t,  $J$  = 7.6 Hz, 1 H,  $=\text{CH}$ );  $^{13}\text{C}$  NMR (125 MHz,  $\text{CDCl}_3$ )  $\delta$  14.03, 14.06, 19.33, 22.57 ( $\text{CH}_3$ ), 36.56, 39.78, 42.91 ( $\text{CH}_2$ ) 47.11 (CH), 59.22 (C), 61.39, 61.42 ( $\text{OCH}_2$ ), 109.99, 111.16 ( $=\text{CH}_2$ ), 123.02 ( $=\text{CH}$ ), 140.57, 144.73, 146.06 ( $=\text{C}$ ), 171.42 ( $\text{C}=\text{O}$ ); IR (neat) 2990, 1730 ( $\nu_{\text{CO}}$ ), 1645, 1445, 1365, 1240, 1190, 1160, 1075, 890  $\text{cm}^{-1}$ ; GCMS (EI, 70eV)  $m/z$  (rel int, %) 320 ( $\text{M}^+$ , 27), 292 (17), 246 (92), 203 (52), 173 (100). Anal. Calcd for  $\text{C}_{19}\text{H}_{28}\text{O}_4$ : C, 71.22; H, 8.81. Found: C, 71.13; H, 9.05.

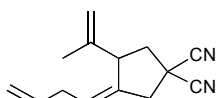

**(Z)-3-(3-Methylbut-3-enylidene)-4-(prop-1-en-2-yl)cyclopentane-1,1-dicarbonitrile**

**(3ab)**: a colorless oil; bp 100 °C (2 mmHg);  $R_f$  = 0.63 (hexane/AcOEt = 4:1);  $^1\text{H}$  NMR (500 MHz,  $\text{CDCl}_3$ )  $\delta$  1.71 (s, 3 H,  $\text{CH}_3$ ), 2.20-2.25 (m, 1 H,  $\text{CH}_2$ ), 2.74 (t,  $J$  = 6.0 Hz, 2 H,  $\text{CH}_2$ ), 2.80-2.84 (m, 1 H,  $\text{CH}_2$ ), 2.98-3.12 (m, 2 H,  $\text{CH}_2$ ), 3.56 (t,  $J$  = 8.5 Hz, 1 H,  $=\text{CH}$ ), 4.88 (s, 1 H,  $=\text{CH}$ ), 4.92 (s, 1 H,  $=\text{CH}$ ), 4.99-5.13 (m, 2 H,  $=\text{CH}$ ) 5.68-5.78 (m, 2 H,  $=\text{CH}$ );  $^{13}\text{C}$  NMR (125 MHz,  $\text{CDCl}_3$ )  $\delta$  19.08, 32.48, 32.77, 43.65, 46.16, 46.44 ( $\text{CH}_3$ ,  $\text{CH}_2$ , CH, and C), 113.46, 115.51, 115.63, 115.73, 127.36, 135.10 ( $=\text{CH}_2$ ,  $=\text{CH}$ , and  $=\text{C}$ ), 143.15 (CN); IR (neat) 2970, 1640, 1420, 910  $\text{cm}^{-1}$ ; DIMS (EI, 70 eV)  $m/z$  (rel int, %) 212 ( $\text{M}^+$ , 4), 197 (51), 170 (84), 156 (63), 142 (100). HRMS for  $\text{C}_{14}\text{H}_{16}\text{N}_2$  ( $\text{M}^+$ ): calcd 212.1314; found 212.1287. Anal. Calcd for  $\text{C}_{14}\text{H}_{16}\text{N}_2$  ( $\text{M}^+$ ): calcd C, 79.21; H, 7.60; N, 13.20. found C, 79.20; H, 7.78; N, 13.09.

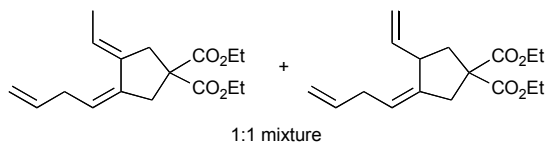

**A mixture of (3*Z*,4*E*)-diethyl 3-(but-3-enylidene)-4-ethylidenecyclopentane-1,1-dicarboxylate and (*Z*)-diethyl 3-(but-3-enylidene)-4-vinylcyclopentane-1,1-dicarboxylate (3ac):**

a colorless oil; bp 100 °C (2 mmHg);  $R_f = 0.34$  (hexane/AcOEt = 9:1);  $^1\text{H}$  NMR of ethylidenecyclopentane (500MHz,  $\text{CDCl}_3$ )  $\delta$  1.21-1.27 (m, 6 H,  $\text{CH}_3$ ), 1.73 (d,  $J = 7.0$  Hz, 3 H,  $\text{CH}_3$ ), 2.95-3.00 (m, 6 H,  $\text{CH}_2$ ), 4.12-4.23 (m, 4 H,  $\text{OCH}_2$ ), 4.92-5.07 (m, 2 H,  $=\text{CH}_2$ ), 5.40 (t,  $J = 7.0$  Hz, 1 H,  $=\text{CH}$ ), 5.67-5.88 (m, 2 H,  $=\text{CH} \times 2$ );  $^1\text{H}$  NMR of vinylcyclopentane (500MHz,  $\text{CDCl}_3$ )  $\delta$  1.21-1.27 (m, 6 H,  $\text{CH}_3$ ), 1.98 (dd,  $J = 13.5, 7.4$  Hz, 1 H, one of  $\text{CH}_2$ ), 2.70 (ddd,  $J = 13.5, 7.4, 1.8$  Hz, 1 H, one of  $\text{CH}_2$ ), 2.73 (t,  $J = 6.8$  Hz, 2 H,  $\text{CH}_2$ ), 2.81 (d,  $J = 16.2$  Hz, 1 H, one of  $\text{CH}_2$ ), 3.03 (dt,  $J = 16.2, 1.8$  Hz, 1 H, one of  $\text{CH}_2$ ), 3.37 (q,  $J = 7.3$  Hz, 1 H, CH), 4.12-4.23 (m, 4 H,  $\text{OCH}_2$ ), 4.92-5.07 (m, 4 H,  $=\text{CH}$ ), 5.42 (t,  $J = 7.0$  Hz, 1 H,  $=\text{CH}$ ), 5.67-5.88 (m, 2 H,  $=\text{CH}$ );  $^{13}\text{C}$  NMR of the mixture (125 MHz,  $\text{CDCl}_3$ )  $\delta$  14.05, 15.35 ( $\text{CH}_3$ ), 32.63, 33.26, 38.28, 40.65, 41.81, 42.92, ( $\text{CH}_2$ ) 43.82 (CH), 57.27, 59.08 (C), 61.42, 61.45, 61.48 ( $\text{OCH}_2$ ), 114.18, 114.62, 114.93 ( $=\text{CH}_2$ ), 121.18, 121.76, 122.36, 136.81, 136.85, 136.91 ( $=\text{CH}$ ), 137.10, 140.06, 140.57 ( $=\text{C}$ ), 171.49, 171.59 ( $\text{C}=\text{O}$ ); IR (neat) 2990, 1730 ( $\nu_{\text{CO}}$ ), 1250, 1190  $\text{cm}^{-1}$ ; DIMS (EI, 70eV)  $m/z$  (rel int, %) 292 ( $\text{M}^+$ , 56), 219 (100). Anal. Calcd for  $\text{C}_{17}\text{H}_{24}\text{O}_4$ : C, 69.84; H, 8.27. Found: C, 69.62; H 8.42.

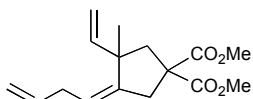

**(*Z*)-Dimethyl 4-(but-3-enylidene)-3-methyl-3-vinylcyclopentane-1,1-dicarboxylate (3ad):** colorless oil; bp 120 °C (2 mmHg);  $R_f = 0.45$  (hexane/AcOEt = 4:1);  $^1\text{H}$  NMR (500MHz,  $\text{CDCl}_3$ )  $\delta$  1.26 (s, 3 H,  $\text{CH}_3$ ), 2.30 (d,  $J = 13.7$  Hz, 1 H, one of  $\text{CH}_2$ ), 2.50 (d,  $J = 13.7$  Hz, 1 H, one of  $\text{CH}_2$ ), 2.73-2.79 (m, 2 H,  $\text{CH}_2$ ), 3.02-3.04 (m, 2 H,  $\text{CH}_2$ ) 3.68 (s, 3 H,  $\text{OCH}_3$ ), 3.73 (s, 3 H,  $\text{OCH}_3$ ), 4.95-5.00 (m, 4 H,  $=\text{CH}_2$ ), 5.38 (tt,  $J = 7.5, 1.9$  Hz, 1 H,  $=\text{CH}$ ), 5.75 (ddt,  $J = 17.1, 10.1, 6.1$  Hz, 1 H,  $=\text{CH}$ ), 5.83 (dd,  $J = 17.4, 10.3$  Hz, 1 H,  $=\text{CH}$ );  $^{13}\text{C}$  NMR (125 MHz,  $\text{CDCl}_3$ )  $\delta$  25.31 ( $\text{CH}_3$ ), 32.41, 42.92 ( $\text{CH}_2$ ), 46.89 (C), 49.82 ( $\text{CH}_2$ ), 52.59, 52.74 ( $\text{OCH}_3$ ), 58.09 (C), 111.21, 114.71 ( $=\text{CH}_2$ ), 122.13, 137.06 ( $=\text{CH}$ ), 143.99 (C), 144.84 ( $=\text{CH}$ ), 171.81, 172.28 ( $\text{C}=\text{O}$ ); IR (neat) 2960, 1740 ( $\nu_{\text{CO}}$ ), 1430, 1260, 910  $\text{cm}^{-1}$ ; DIMS (EI, 70eV)  $m/z$  (rel int, %) 278 ( $\text{M}^+$ , 6), 218 (73), 177 (55), 164 (50), 159 (100). HRMS for  $\text{C}_{16}\text{H}_{22}\text{O}_4$  ( $\text{M}^+$ ): calcd 278.1518, found 278.1528. Anal. Calcd for  $\text{C}_{16}\text{H}_{22}\text{O}_4$ : C, 69.04; H, 7.97. Found: C, 68.86; H, 8.03.

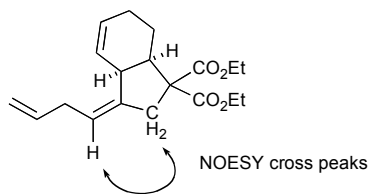

**(3Z,3aS,7aR)-Diethyl**

**3-(but-3-enylidene)-3,3a,7,7a-tetrahydro-2H-indene-1,1(6H)-dicarboxylate (3ae):** a colorless oil; bp 120 °C (2 mmHg);  $R_f = 0.66$  (hexane/AcOEt = 4:1);  $^1\text{H NMR}$  (500MHz,  $\text{CDCl}_3$ )  $\delta$  1.22-1.26 (m, 6 H,  $\text{CH}_3$ ), 1.39-1.46 (m, 1 H, one of  $\text{CH}_2$ ), 1.94-2.04 (m, 2 H,  $\text{CH}_2$ ), 2.65 (d,  $J = 15.8$  Hz, 1 H, one of  $\text{CH}_2$ ), 2.75-2.84 (m, 2 H,  $\text{CH}_2$ ), 2.88-2.98 (m, 1 H, CH), 3.23 (d,  $J = 15.8$  Hz, 1 H, one of  $\text{CH}_2$ ), 3.34-3.40 (m, 1 H, CH), 4.11-4.28 (m, 4 H,  $\text{OCH}_2$ ), 4.95-5.24 (m, 2 H,  $=\text{CH}_2$ ), 5.30 (t,  $J = 7.3$  Hz, 1 H,  $=\text{CH}$ ), 5.75-5.85 (m, 3 H,  $=\text{CH}$ ); The NOESY cross peaks were observed at  $\delta$  4.11 vs.  $\delta$  2.65 and 3.23;  $^{13}\text{C NMR}$  (125 MHz,  $\text{CDCl}_3$ )  $\delta$  14.06, 14.16 ( $\text{CH}_3$ ), 22.41, 23.51, 32.99, 39.21 ( $\text{CH}_2$ ), 40.20, 42.30 (CH), 61.24, 61.35 ( $\text{OCH}_2$ ), 63.09 (C), 114.81 ( $=\text{CH}_2$ ), 120.71, 126.96, 127.14, 136.86 ( $=\text{CH}$ ), 140.79 ( $=\text{C}$ ), 169.76, 171.43 ( $\text{C}=\text{O}$ ); IR (neat) 2980, 1730 ( $\nu_{\text{CO}}$ ), 1250  $\text{cm}^{-1}$ ; GCMS (EI, 70eV)  $m/z$  (rel int, %) 273 ( $\text{M}^+ - \text{OEt}$ , 7), 203 (100). Anal. Calcd for  $\text{C}_{19}\text{H}_{26}\text{O}_4$ : C, 71.67; H, 8.23. Found: C, 71.33; H 8.33.

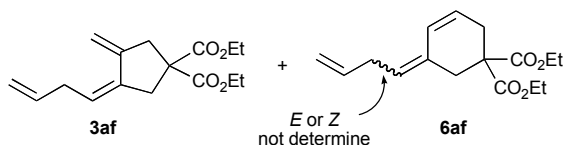

**A mixture of (Z)-diethyl 3-(but-3-enylidene)-4-methylenecyclopentane-1,1-dicarboxylate (3af) and diethyl 5-(but-3-enylidene)cyclohex-3-ene-1,1-dicarboxylate (6af):**

a colorless oil; bp 100 °C (2 mmHg),  $R_f = 0.34$  (hexane/AcOEt = 9:1);  $^1\text{H NMR}$  of **3af** (500MHz,  $\text{CDCl}_3$ )  $\delta$  1.24 (t,  $J = 7.3$  Hz, 6 H,  $\text{CH}_3$ ), 2.94-3.06 (m, 6 H,  $\text{CH}_2$ ), 4.18 (q,  $J = 7.3$  Hz, 4 H,  $\text{OCH}_2$ ), 5.02 (dq,  $J = 10.1, 1.7$  Hz, 1 H, one of  $=\text{CH}_2$ ), 5.07 (dq,  $J = 17.1, 1.7$  Hz, 1 H, one of  $=\text{CH}_2$ ), 5.14 (s, 1 H, one of  $=\text{CH}_2$ ), 5.20 (s, 1 H, one of  $=\text{CH}_2$ ), 5.54 (t,  $J = 6.5$  Hz, 1 H,  $=\text{CH}$ ), 5.78-5.88 (m, 1 H,  $=\text{CH}$ );  $^1\text{H NMR}$  of **6af** (500MHz,  $\text{CDCl}_3$ )  $\delta$  1.19-1.27 (m, 6 H,  $\text{CH}_3$ ), 2.80-2.94 (m, 6 H,  $\text{CH}_2$ ), 4.16-4.21 (m, 4 H,  $\text{OCH}_2$ ), 4.90-5.20 (m, 2 H,  $=\text{CH}_2$ ), 5.41 (t,  $J = 7.4$  Hz, 1 H,  $=\text{CH}$ ), 5.63-5.67 (m, 1 H,  $=\text{CH}$ ), 5.78-5.88 (m, 1 H,  $=\text{CH}$ ), 6.01-6.11 (m, 1 H,  $=\text{CH}$ );  $^{13}\text{C NMR}$  of **3af** (125 MHz,  $\text{CDCl}_3$ )  $\delta$  14.03 ( $\text{CH}_3$ ), 35.27, 42.50, 42.77 ( $\text{CH}_2$ ), 57.49 (C), 61.39 ( $\text{OCH}_2$ ), 110.77, 115.50 ( $=\text{CH}_2$ ), 124.35 ( $=\text{CH}$ ), 136.17 ( $=\text{C}$ ), 136.32 ( $=\text{CH}$ ), 171.12, 171.33 ( $\text{O}=\text{C}$ );  $^{13}\text{C NMR}$  of **6af** (125 MHz,  $\text{CDCl}_3$ )  $\delta$  14.09 ( $\text{CH}_3$ ), 30.51, 31.20, 31.70 ( $\text{CH}_2$ ), 53.78 (C), 61.38, 61.42 ( $\text{OCH}_2$ ), 115.23, 123.76, 124.36, 126.77, 130.35,

132.08 (=CH<sub>2</sub>, =CH, and =C), 172.39, 172.64 (O=C); IR (neat) 2990, 1730 (<sup>v</sup>CO), 1445, 1365, 1250, 1190, 1160, 1075 cm<sup>-1</sup>; DIMS (EI, 70eV) *m/z* (rel int, %) 278 (M<sup>+</sup>, 28), 218 (100). Anal. Calcd for C<sub>16</sub>H<sub>22</sub>O<sub>4</sub>: C, 69.04; H, 7.97. Found: C, 68.75; H 7.83.

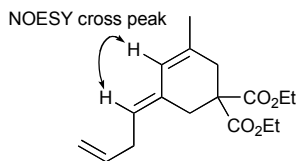

**(5E)-Diethyl 5-(but-3-enylidene)-3-methylcyclohex-3-ene-1,1-dicarboxylate (6ag):** a colorless oil; bp 145 °C (5 mmHg); *R<sub>f</sub>* = 0.57 (hexane/AcOEt = 6:1); <sup>1</sup>H NMR (500MHz, CDCl<sub>3</sub>) δ 1.23 (t, *J* = 7.0 Hz, 6 H, CH<sub>3</sub>), 1.79 (s, 3 H, CH<sub>3</sub>), 2.57 (s, 2 H, CH<sub>2</sub>), 2.79 (s, 2 H, CH<sub>2</sub>) 2.88 (t, *J* = 6.7 Hz, 2 H, CH<sub>2</sub>), 4.16 (q, *J* = 7.0 Hz, 4 H, CH<sub>2</sub>), 4.97 (dq, *J* = 10.0, 1.7 Hz, 1 H, one of =CH<sub>2</sub>), 5.03 (dq, *J* = 17.1, 1.7 Hz, 1 H, one of =CH<sub>2</sub>), 5.30 (t, *J* = 7.4 Hz, 1 H, =CH), 5.80 (ddt, *J* = 17.1, 10.0, 7.4 Hz, 1 H, =CH), 5.83 (s, 1 H, =CH); The NOESY cross peak was observed at δ 5.30 vs. δ 5.83; <sup>13</sup>C NMR (125 MHz, CDCl<sub>3</sub>) δ 14.02, 23.37 (CH<sub>3</sub>), 30.18, 31.77, 35.90 (CH<sub>2</sub>) 54.30 (C), 61.42 (OCH<sub>2</sub>), 114.76 (=CH<sub>2</sub>), 124.18, 125.66, 132.50 (=CH), 132.73, 136.60 (=C), 171.14 (C=O); IR (neat) 2995, 1735 (<sup>v</sup>CO), 1445, 1365, 1300, 1250, 1185, 1100, 1080, 1055, 910, 860 cm<sup>-1</sup>; DIMS (EI, 70eV) *m/z* (rel int, %) 292 (M<sup>+</sup>, 44), 218 (95), 145 (100). Anal. Calcd for C<sub>17</sub>H<sub>24</sub>O<sub>4</sub>: C, 69.84; H, 8.27. Found: C, 69.89; H, 8.41.
